# Supplementary material for: Multi-length scale morphology of nonfullerene all-small molecule blends and its relation to device function in organic solar cells
Source: Royal Society of Chemistry journal article supplement (doi:10.1039/c8qm00503f), 2018-11-19
Supplement: c8qm00503f1.pdf [file c8qm00503f1.pdf]

## Supporting Information

### Multi-length Scale Morphology of Nonfullerene All-Small Molecule Blends and Its Relation to Device Function in Organic Solar Cells

*Indunil Angunawela<sup>1</sup>, Long Ye<sup>1\*</sup>, Haijun Bin<sup>2</sup>, Zhi-Guo Zhang<sup>2</sup>, Abay Gadisa<sup>1</sup>, Yongfang Li<sup>2\*</sup>, and Harald Ade<sup>1\*</sup>*

<sup>1</sup>Department of Physics and Organic and Carbon Electronics Lab (ORaCEL), North Carolina State University, Raleigh, NC 27695, United States  
E-mail: hwade@ncsu.edu; lye4@ncsu.edu

<sup>2</sup>CAS Research/Education Center for Excellence in Molecular Sciences, CAS Key Laboratory of Organic Solids, Institute of Chemistry, Chinese Academy of Sciences, 100190 Beijing, China  
E-mail: liyf@iccas.ac.cn

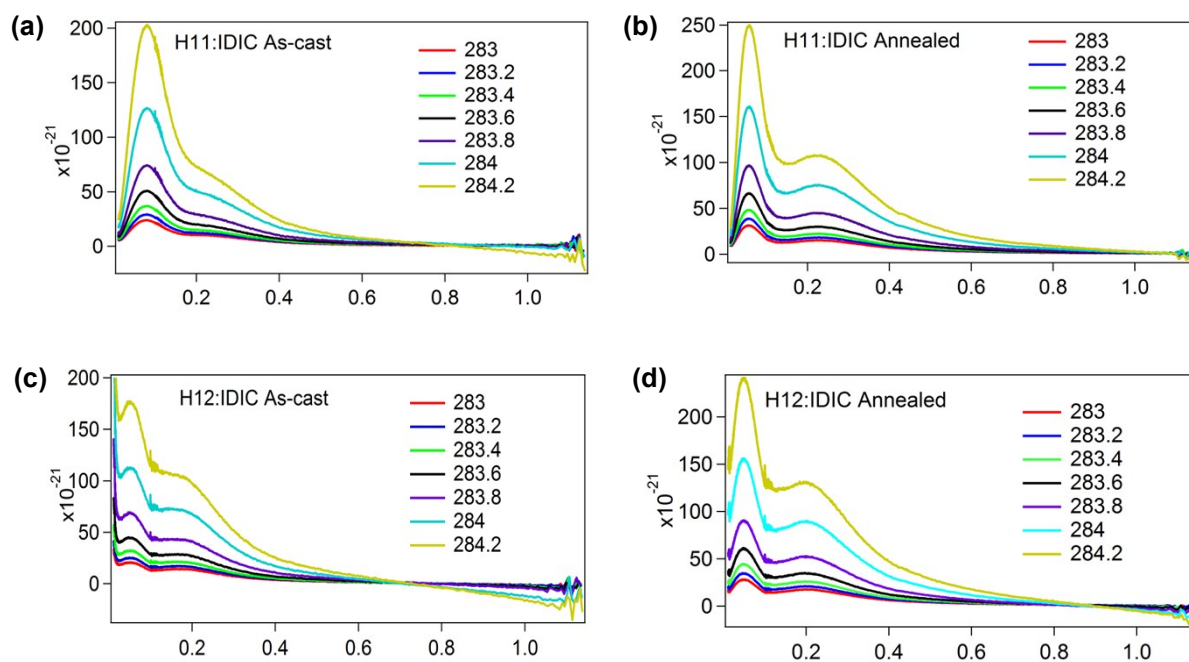

**Figure S1.** RSoXS profiles at different energies for both as-cast and annealed blends.

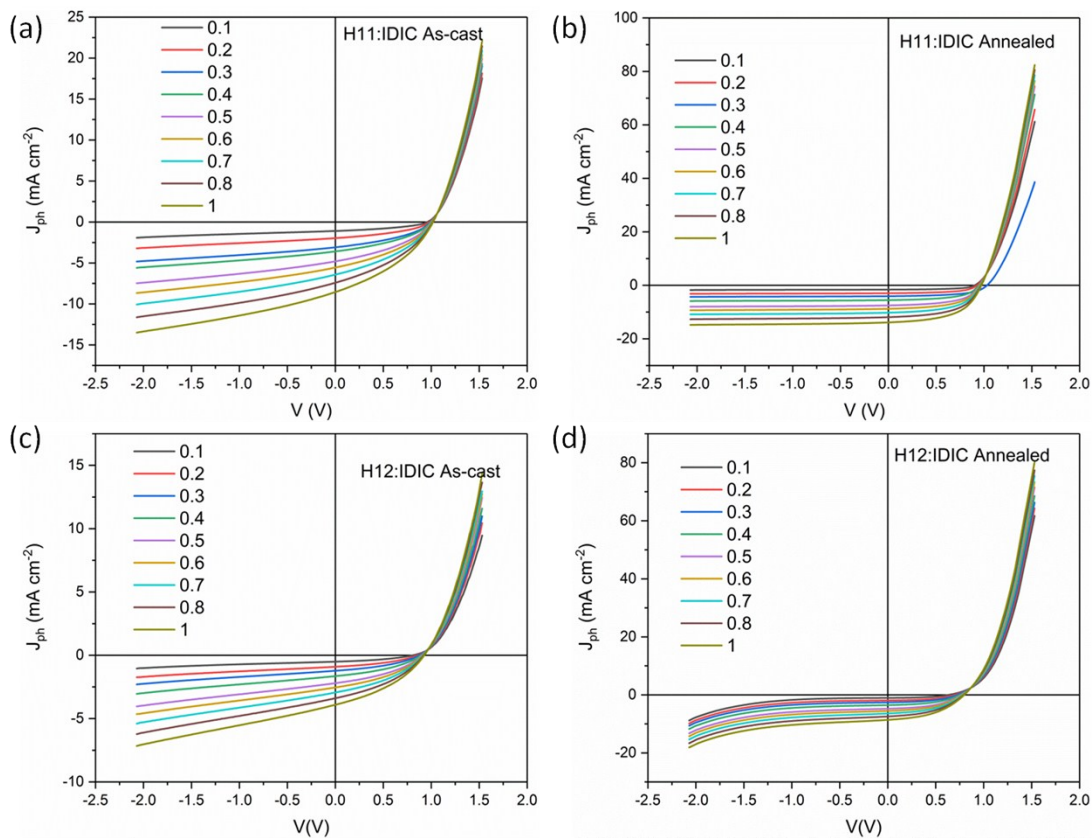

**Figure S2-** Light intensity dependence of  $J_{ph}$  for both as-cast and annealed blends

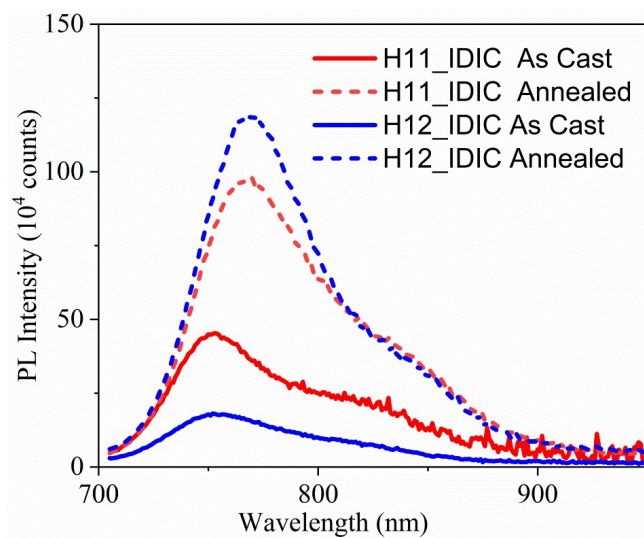

**Figure S3.** Normalized photoluminescence spectra of as cast and annealed blend films.

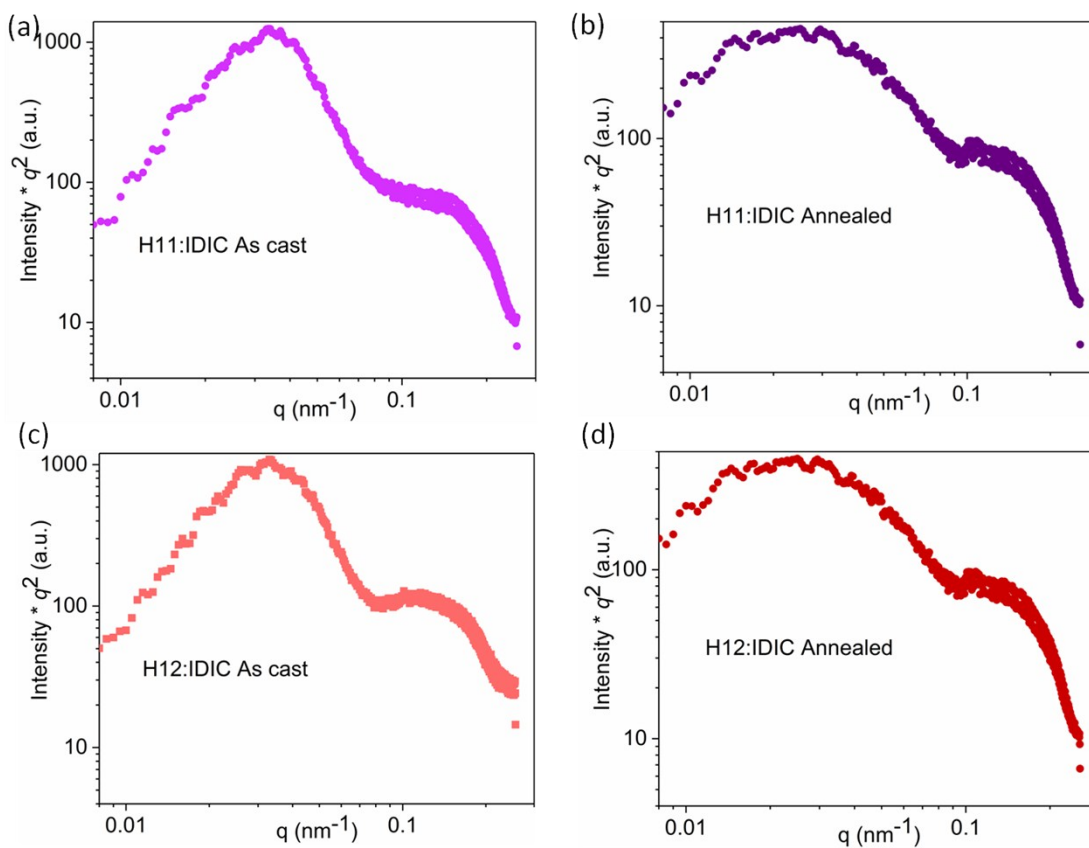

**Figure S4-** PSD analysis of AFM phase images of the blend films

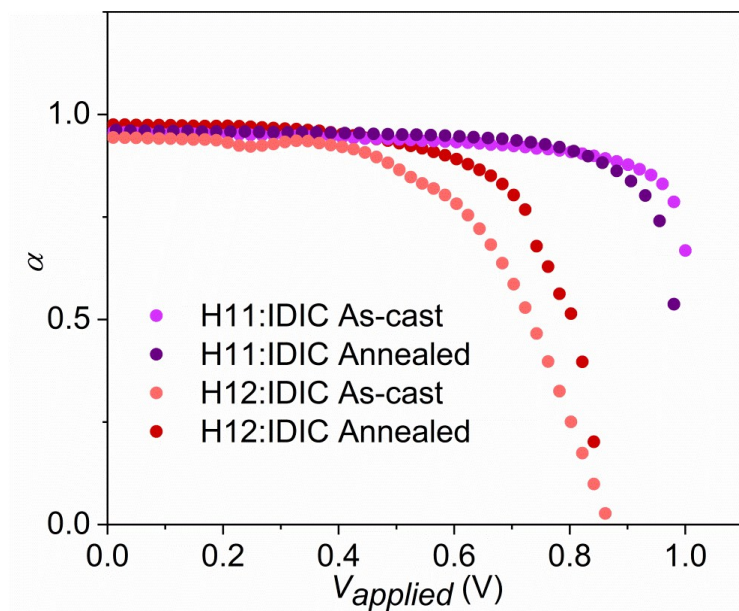

**Figure S5-**  $\alpha$  as a function of the voltage applied to the devices for both as-cast and annealed blends.

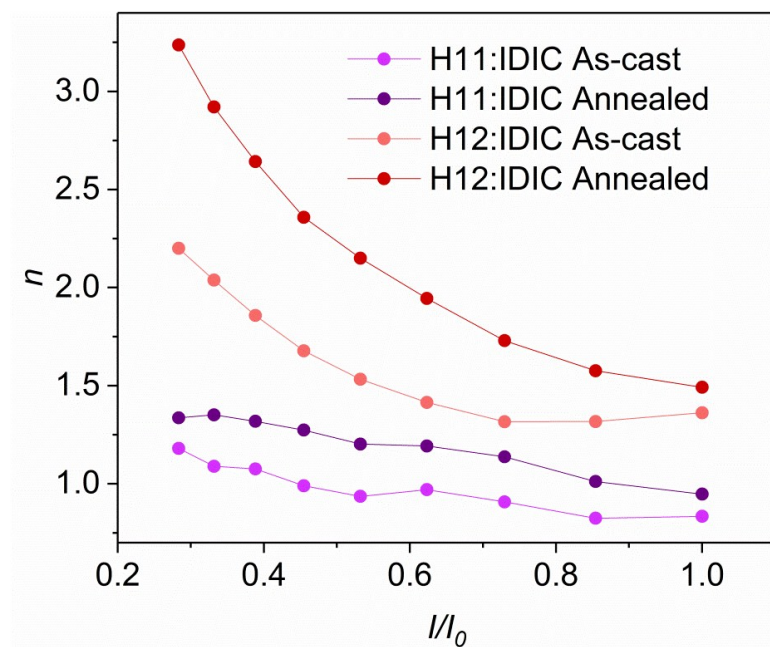

**Figure S6-** Ideality factor as a function of normalized light intensity where  $I$  is the light intensity and  $I_0$  is the maximum light intensity (a non calibrated LED light was used which has a maximum light intensity more than 1 Sun and 1 Sun is around 0.8 of this scale).
